## Title Page

**Title:** Effects of hydrometeorological and other factors on SARS-CoV-2 reproduction number in three contiguous countries of Tropical Andean South America: a spatiotemporally disaggregated time series analysis.

### Author names and affiliations:

Josh M. Colston<sup>i</sup> - Division of Infectious Diseases and International Health, University of Virginia School of Medicine, Charlottesville, VA, 22903, USA

Patrick Hinson<sup>i</sup> - College of Arts and Sciences, University of Virginia, Virginia, USA

Nhat-Lan H. Nguyen<sup>i</sup> - College of Arts and Sciences, University of Virginia, Virginia, USA

Yen Ting Chen<sup>i</sup> - Department of Emergency Medicine, Chi-Mei Medical Center, Tainan, Taiwan

Hamada S. Badr - Department of Earth and Planetary Sciences, Johns Hopkins Krieger School of Arts and Sciences, Baltimore, 21218, MA, USA

Gaige H. Kerr - Department of Environmental and Occupational Health, Milken Institute School of Public Health, George Washington University, Washington, DC

Lauren M. Gardner - Department of Civil and Systems Engineering, Johns Hopkins University, Baltimore, MD

David N. Martin - Claude Moore Health Sciences Library, University of Virginia School of Medicine, Virginia, USA

Antonio M. Quispe - Postgraduate School, Universidad Continental, Lima, Peru

Francesca Schiaffino - Faculty of Veterinary Medicine, Universidad Peruana Cayetano Heredia, Lima, Peru; Division of Infectious Diseases and International Health and Public Health Sciences, University of Virginia School of Medicine, Charlottesville, VA, 22903, USA

Margaret N. Kosek - Division of Infectious Diseases and International Health and Public Health Sciences, University of Virginia School of Medicine, Charlottesville, VA, 22903, USA

Benjamin F. Zaitchik - Department of Earth and Planetary Sciences, Johns Hopkins Krieger School of Arts and Sciences, Baltimore, 21218, MA, USA, [zaitchik@jhu.edu](mailto:zaitchik@jhu.edu)

**Corresponding author:** Margaret N. Kosek - Division of Infectious Diseases and International Health and Public Health Sciences, University of Virginia School of Medicine, Charlottesville, VA, 22903, USA, [mkosek@virginia.edu](mailto:mkosek@virginia.edu)

---

<sup>i</sup> These authors contributed equally.

## Abstract:

**Background:** The COVID-19 pandemic has caused societal disruption globally and South America has been hit harder than other lower-income regions. This study modeled effects of 6 weather variables on district-level SARS-CoV-2 reproduction numbers ( $R_t$ ) in three contiguous countries of Tropical Andean South America (Colombia, Ecuador, and Peru), adjusting for environmental, policy, healthcare infrastructural and other factors.

**Methods:** Daily time-series data on SARS-CoV-2 infections were sourced from health authorities of the three countries at the smallest available administrative level.  $R_t$  values were calculated and merged by date and unit ID with variables from a Unified COVID-19 dataset and other publicly available sources for May – December 2020. Generalized additive mixed effects models were fitted.

**Findings:** Relative humidity and solar radiation were inversely associated with SARS-CoV-2  $R_t$ . Days with radiation above 1,000 KJ/m<sup>2</sup> saw a 1.3%, and those with humidity above 50%, a 1.0% reduction in  $R_t$ . Transmission was highest in densely populated districts, and lowest in districts with poor healthcare access and on days with least population mobility. Temperature, region, aggregate government policy response and population age structure had little impact. The fully adjusted model explained 3.9% of  $R_t$  variance.

**Interpretation:** Dry atmospheric conditions of low humidity increase, and higher solar radiation decrease district-level SARS-CoV-2 reproduction numbers, effects that are comparable in magnitude to population factors like lockdown compliance. Weather monitoring could be incorporated into disease surveillance and early warning systems in conjunction with more established risk indicators and surveillance measures.

**Funding:** NASA's Group on Earth Observations Work Programme (16-GE016-0047).

**Keywords:** Coronavirus; COVID-19; SARS-CoV-2; Climate; Hydrometeorology; Pandemic disease; Latin America; Peru; Ecuador; Colombia.

## 1 **Introduction:**

2           Since its discovery in Wuhan, China in December 2019, the SARS-CoV-2 virus has  
3 swept the globe, overwhelming national healthcare services in successive waves and  
4 variants, and causing widespread socio-economic insecurity and societal unrest in virtually  
5 every country of the world.<sup>1,2</sup> As of the time of writing, over 533 million infections and 6.3  
6 million deaths globally, have been attributed to the virus<sup>3</sup>, though the true toll is  
7 undoubtedly far higher than official statistics, and may have surpassed 3.8 billion infections  
8 (40% of the global population) and 15 million deaths.<sup>4</sup> South America has been hit harder  
9 by the Coronavirus disease (COVID-19) pandemic than other predominantly lower income  
10 regions with some of the highest excess mortality and case fatality rates (CFR), its 58  
11 million confirmed cases (>256 million estimated total) leading to over 1.3 million  
12 confirmed deaths (>1.7 million total), putting further strain on a region where many  
13 countries struggle with political instability, humanitarian crises, and income inequality.<sup>3-6</sup>  
14 From the early days of the pandemic, questions were raised about the possible influences  
15 of climate and meteorology on the transmission of the virus given the known sensitivity of  
16 other respiratory viruses to these factors.<sup>7,8</sup> One early study noted that COVID-19  
17 community transmission at the beginning of the pandemic was especially high along a  
18 temperate mid-latitude belt of the northern hemisphere.<sup>9</sup> However, it was already clear by  
19 that early stage that the influence of such factors was small relative to that of population  
20 density and age structure, and timing of and compliance with non-pharmaceutical  
21 interventions (NPIs) such as lockdowns, travel restrictions and hygiene measures, and  
22 initial research rightly prioritized these more proximal drivers.<sup>10-12</sup>

23           With the pandemic in its third year, and with the likely prospect that SARS-CoV-2  
24 will continue to circulate as an endemic, seasonal and vaccine-preventable virus for the  
25 foreseeable future<sup>13</sup>, attention has turned again to the role of meteorological factors in  
26 COVID-19 transmission.<sup>8,14</sup> The demand for real-time data with which to track the global  
27 health crisis has prompted a proliferation of online repositories and interfaces, which  
28 curate and disseminate epidemiological data with global scope and increasing spatial and  
29 temporal resolutions.<sup>6,15,16</sup> Disease data can be matched by date and location to high  
30 resolution estimates of spatiotemporal variation in environmental and hydrological  
31 conditions derived from remote sensing and climate models for further analysis.<sup>17</sup>  
32 Numerous studies have applied this approach to subnational unit-level case reports in an  
33 attempt to model associations between hydrometeorological variables and SARS-CoV-2  
34 outcomes<sup>18,19</sup>, however there is considerable variation in how confounding factors and  
35 error in case reporting are captured<sup>20,21</sup>, and a disproportionate emphasis on High Income  
36 Countries, mostly in the temperate mid-latitudes.<sup>22</sup>

37           The aim of this study was to model the effects of weather on the district-level SARS-  
38 CoV-2 reproduction number ( $R_t$ ) for three contiguous countries of Tropical Andean South  
39 America (Colombia, Ecuador, and Peru), with an expanded suite of hydrometeorological  
40 parameters and after further adjusting for environmental, policy, healthcare infrastructural  
41 and other factors during the first wave of the epidemic, when a single circulating variant  
42 predominated and there was no population level immunity that contributed to  
43 transmission dynamics..

44 **Methods:**

45 ***Scope of Analysis:***

46           The three Tropical Andean South American countries of Colombia, Ecuador and  
47 Peru were chosen for this analysis, since together they constitute a large contiguous  
48 territory, roughly evenly split between the northern and southern hemispheres and  
49 broadly divisible into coastal, highland, and interior regions. Furthermore, all three  
50 countries have comparable health information system capacity and make publicly available  
51 daily reports of new COVID-19 cases at highly geographically disaggregated levels. The  
52 analysis was restricted to the mainland areas of the three countries, excluding outlying  
53 island territories, and to the period from May to December 2020, during which  
54 transmission of the virus was fully established and NPIs in place<sup>19</sup>, but before the  
55 emergence of major variants of concern and the introduction of vaccines.

56 ***Epidemiological Data:***

57           Daily time series data on confirmed SARS-CoV-2 infections were sourced from  
58 national health authority websites at the smallest available administrative level  
59 (Colombian municipalities, Ecuadorian cantons and Peruvian districts, hereafter  
60 generically referred to as “districts”).<sup>23-25</sup> These data were used to calculate district-level  
61 daily  $R_t$  using EpiNow2, an R package for estimating time-varying epidemiological  
62 parameters of SARS-CoV-2 from subnational case notification data accounting for right  
63 truncation, underreporting and uncertain reporting delays and incubation periods.<sup>26</sup> Daily,  
64 district-level  $R_t$  estimates were treated as the outcome variable for the analysis and are

65 interpreted as the mean number of new infections caused by a single infected person on a  
66 given day in a given district. If a district records zero cases for an extended period, its daily  
67  $R_t$  will converge on a default value of 1, which is difficult to interpret in the absence of  
68 actual disease. However, because the calculation of  $R_t$  accounts for the disease incubation  
69 period, the metric lags the cases used to calculate it, so changes in  $R_t$  may precede increases  
70 and decreases in case counts by several weeks. It is therefore possible for a district to have  
71 a daily  $R_t$  of greater than 1 while reporting zero cases, due to the delay in increases in  
72 transmission being reflected in case reporting. Due to the high resolution and inclusion of  
73 many remote and sparsely populated districts in the dataset, there was a large proportion  
74 of unit-days with zero reported cases of COVID-19 (75.5%). We therefore excluded all unit-  
75 days in which both: a). no cases were reported and b).  $R_t$  had a calculated value of between  
76 0.95 and 1.05, with the purpose of restricting the analysis to observations with  
77 interpretable outcome values.

### 78 ***Hydrometeorological Data:***

79 Hydrometeorological data were sourced from the Unified COVID-19 dataset  
80 compiled by Badr and colleagues<sup>16</sup>, in which variables were in turn extracted from the  
81 second generation North American Land Data Assimilation System (NLDAS-2) and the fifth  
82 generation European Centre for Medium-Range Weather Forecasts (ECMWF) atmospheric  
83 reanalysis of the global climate (ERA5) at administrative unit centroids.<sup>27-29</sup> Both datasets  
84 perform well in validation studies<sup>28,30</sup> and are comparable to those used in retrospective  
85 infectious disease modeling<sup>31</sup>, with the advantage that their much shorter latency periods  
86 (4-6 days) make them better suited for prospective forecasting of disease dynamics.<sup>16</sup> All

87 available hourly, population-weighted ERA5 and NLDAS values since January 1, 2020 were  
88 extracted, aggregated to daily mean or total values, and matched by date and district to the  
89  $R_t$  values. The following variables were included as the main exposures of interest based on  
90 their documented or hypothesized associations with SARS-CoV-2: near surface air  
91 temperature ( $^{\circ}\text{C}$ )<sup>32,33</sup>; relative humidity (%)<sup>34</sup>; solar radiation ( $\text{KJ}/\text{m}^2$ )<sup>35</sup>; total precipitation  
92 volume ( $\text{mm}$ )<sup>36</sup>; average 10-m above ground wind speed ( $\text{m}/\text{s}$ ).<sup>37</sup> In addition, average  
93 volumetric soil moisture ( $\text{m}^3/\text{m}^3$ ) was included as a negative control exposure<sup>38</sup>, since it is  
94 a variable presumed to affect infectious disease transmission through its influence on  
95 pathogen survival on surfaces and fomites<sup>31</sup>, which is thought to be at most only a  
96 secondary mode of SARS-CoV-2 transmission.<sup>39</sup> Specific humidity ( $\text{kg}/\text{kg}$ ) estimates were  
97 excluded from the main analysis due to being highly correlated with temperature in this  
98 dataset ( $\rho = 0.88$ ), and only included in a secondary analysis reported in the  
99 **supplementary appendix**.

#### 100 ***Covariate Data:***

101 The following variables (summarized in **Table 1**) were included as covariates to  
102 adjust for their potential confounding effects on the main associations of interest:

103 **Natural regions:** To account for potential residual confounding due to geographical  
104 and topographical differences across the three countries that may affect disease  
105 transmission<sup>40</sup>, their territories were grouped into three broad, cross-cutting ecological  
106 zones, based on the “natural region” categories used by the Peruvian national statistical  
107 authority - coastal, highland (the Andes), and interior (the Amazon and Orinoco basins).<sup>41-</sup>

108 <sup>43</sup> These were deemed to be less arbitrary from the point of view of transmission and

109 meteorological dynamics than alternative groupings based on political divisions such as  
110 higher-level administrative units. The three regions are shown in **figure 3d**.

111 **Population density:** Densely populated urban areas are often struck earlier and  
112 harder by epidemics due to their roles as transport hubs and increased contact rates  
113 between susceptible and infectious individuals.<sup>44</sup> Since sparsely populated areas may also  
114 differ systematically in the climate conditions that they experience, population density was  
115 included as a potentially confounding covariate in this analysis and calculated as the  
116 district-level zonal mean value extracted from the WorldPop raster of global population  
117 distribution.<sup>45</sup>

118 **Population age structure:** Because the symptomaticity and severity of SARS-CoV-2  
119 infection increases with age<sup>46</sup>, areas with a larger proportion of their population in the  
120 more susceptible elderly age groups may have higher rates of case reporting and  
121 infectiousness. Population age structure varies geographically to a considerable degree,  
122 therefore the proportion of a district's population that is over the age of 65 years was  
123 calculated from the WorldPop rasters of population per 5-year age group and included in  
124 the model.

125 **Access to healthcare facilities:** The time it takes to travel to a health facility to seek  
126 care also varies geographically as a function of population density, transport infrastructure  
127 and local topography.<sup>47</sup> Connectivity has been shown to influence variation in SARS-CoV-2  
128 outbreaks in sub-Saharan Africa<sup>48</sup> and travel time to care-seeking might affect contact rates  
129 between infected and susceptible individuals or the probability that infected persons are  
130 treated and registered in health information systems. The district-level mean travel times



131 to the nearest healthcare facility using motorized transport in 2020 were extracted using  
132 zonal statistics from the geographical estimates published by Weiss and colleagues.<sup>47</sup>

133 **Government policy response data:** The timing and stringency with which national  
134 governments introduced public health interventions such as travel restrictions, school  
135 closures and bans on gatherings and public events are major factors influencing  
136 geographical variation in the trajectory of the pandemic.<sup>19,44,49</sup> The Oxford Covid-19  
137 Government Response Tracker (OxCGRT) project collates information on numerous  
138 government policy responses into a publicly available database, assigns them scores  
139 reflecting their strictness and aggregates these into policy metrics including the stringency  
140 index<sup>50</sup>, which was included as a national-level, time-varying covariate in this analysis.

141 **Population mobility:** Compliance with NPI mandates and recommendations differ  
142 between subnational populations leading to variation in transmission risk.<sup>51,52</sup> As a proxy  
143 indicator for compliance with social distancing, lockdown measures and travel restrictions,  
144 population mobility metrics were sourced from Google's Community Mobility Reports.<sup>53</sup>  
145 These indicators track trends in Android smartphone users' movements over time relative  
146 to a pre-pandemic baseline, by subnational region and for six categories of location.<sup>53</sup> The  
147 "residential" metric was used and merged with the database by date at the 1<sup>st</sup>  
148 administrative unit level (hereafter generically referred to as "provinces"), since coverage  
149 was more complete at that level than for districts. This variable can be interpreted as the  
150 percent change in time spent in residential areas compared to before the pandemic, with a  
151 higher value therefore corresponding to greater population compliance with social  
152 distancing or lockdowns. The Google mobility dataset includes intentional gaps for unit-

153 dates that don't meet a quality and privacy threshold, which are to be considered "true  
154 unknowns", so these intermittent missing values were substituted using linear  
155 interpolation by date within each province.<sup>53</sup>

## 156 **Statistical Analysis**

157 Variables were merged based on district/province ID and date and highly skewed  
158 variables were normalized using Ordered Quantile (ORQ) transformation. A generalized  
159 additive mixed effects model (GAMM) was fitted to the  $R_t$  outcome assuming a Gaussian  
160 distribution, log link, and REML smoothing parameter estimation method. Cubic spline  
161 terms with 3 degrees of freedom were specified for all continuous exposure variables to  
162 account for non-linearity. Natural regions were modeled as a factor variable with the  
163 coastal region as the reference category. District-level random effects were specified to  
164 account for within-unit non-independence of the observations. The modeled, adjusted  
165 associations were visualized in partial dependence plots of  $R_t$  predictions across the range  
166 of values of each continuous exposure. Variable importance was assessed and ranked by  
167 computing the mean absolute accumulated local effects (ALE) of each predictor. To assess  
168 and compare relative effects, highly ALE-ranked variables were dichotomized at specific  
169 thresholds and otherwise identical GAMMs refitted to calculate the percent difference in  $R_t$   
170 on unit-days above compared to below those thresholds.<sup>54</sup> To quantify the variance  
171 explained by the hydrometeorological relative to the other variables, the  $R^2$  of the final  
172 model was compared to that of an otherwise identical model that included only the non-  
173 hydrometeorological predictors. Data processing, visualization, and analysis were carried  
174 out using R 4.0.3<sup>55</sup>, Stata 16<sup>56</sup>, and ArcMap 10.8.<sup>57</sup>

175 **Results:**

176 Data from the 3,212 mainland districts of the three countries were included for the  
177 245-day period from May 1<sup>st</sup> to December 31<sup>st</sup>, 2020, resulting in a dataset with a total of  
178 786,940 unit-day observations. 564,738 (71.8%) observations were excluded due to having  
179 both zero cases and an estimated  $R_t$  value of between 0.95 and 1.05. A further 6,952 (3.6%  
180 of the remaining observations had missing mobility index data, leaving 184,870 complete  
181 observations to which the model was fitted. **Figure 1** shows choropleth maps of the  
182 geographical distribution of cumulative COVID-19 cases and average SARS-CoV-2  $R_t$  (after  
183 applying exclusion criteria) summarized from daily values over the period of analysis.  
184 Neither showed a marked geographical pattern, though cumulative case burden (**figure**  
185 **1a.**) exhibited notably lower values in the Peruvian highland districts, while many of the  
186 highest average  $R_t$  values (**figure 1b.**) were seen in the Ecuadorian and Colombian  
187 highlands. In Peru, the districts reporting more than 10,000 cases over the analysis period  
188 were in the Greater Lima Region as well as the other coastal cities of Trujillo and Chiclayo,  
189 while in Ecuador, aside from cantons of the three major cities of Guayaquil, Quito and  
190 Cuenca, the much less populous canton of Cañar also exceeded this threshold. Colombia  
191 experienced more numerous pockets of high cumulative cases in the major metropolitan  
192 municipalities of its highlands – Bogotá, Medellín, Cali – and Caribbean coast –  
193 Barranquilla, Cartagena – as well as several relatively smaller cities including Valledupar,  
194 Manizales, and Soledad.

195 **Figure 2** shows equivalent choropleth maps for averages of the six  
196 hydrometeorological variables. The lowest average temperature values (**figure 2a.**)  
197 occurred along the Andes, particularly in the southern Peruvian stretch, while the highest

198 occurred in the low-lying interior regions of the Amazon and Orinoco basins, as well as  
199 coastal Ecuador and Colombia. relative humidity (**figure 2b.**) and soil moisture (**figure 2c.**)  
200 exhibited similar spatial distributions with the highest average values in the interior areas  
201 of the three countries and along the Colombian coast, except for the arid Guajira peninsula,  
202 which had very low soil moisture content of  $<0.2 \text{ m}^3/\text{m}^3$ . Other areas of very low humidity  
203 and soil moisture included Peru's coastal Sechura Desert and Colombia's central Tatacoa  
204 Desert, as well as small pockets along the Ecuadorian coast. Average wind speeds (**figure**  
205 **2d.**) exceeded 1 m/s along most of the Pacific and Caribbean coasts, and the high elevation  
206 Andean districts, while the mid-elevation windward and leeward Andean districts tended  
207 to have wind speeds of less than 0.5 m/s as did parts of north central Colombia.  
208 Precipitation distribution (**figure 2e.**) largely mirrored that of soil moisture and relative  
209 humidity with the Guajira, Sechura and Tatacoa Deserts experiencing low average daily  
210 rainfall of  $<1.5\text{mm}$ , and the Pacific coast and interior of Colombia exhibiting the wettest  
211 conditions. A belt of high solar radiation (**figure 2f.**) extended along Peru's coast, which  
212 widened in the southeast to incorporate highland areas of the Andean Plateau. The only  
213 other area of comparable radiation levels was on Colombia's Guajira peninsula.

214 **Figure 3** shows equivalent maps for the non-hydrometeorological covariates,  
215 including the extents of the three natural regions (**figure 3d.**). The population (**figure 3f.**)  
216 of the three countries is concentrated along the coasts and highlands, with the exceptions  
217 of Colombia's sparsely populated Darién Gap and the high elevation districts of Peru's  
218 southeast Andes. The population of the countries' interiors is not only sparse, but also most  
219 highly skewed towards the younger age groups (**figure 3e.**), while the highlands and Peru's  
220 coastal plains have some of the districts with the highest percentage of the population over

221 65 years. Access to healthcare, as measured by average travel time to the nearest health  
222 facility by motor transport (**figure 3a.**), tends to vary inversely with population density,  
223 with the lowest levels of accessibility seen in the interior regions and along Colombia's  
224 Pacific coast, the coasts and Andean highlands having the majority of districts with an  
225 average travel time of under an hour. Over the period from May to December 2020, Peru  
226 had the most, and Ecuador the least stringent policy response to the pandemic on average  
227 (**figure 3b.**). Average time spent in residential locations (**figure 3c.**) was highest (meaning  
228 mobility was lowest) in Peru's coastal and southern highland areas, in Ecuador's central  
229 highlands and in the Capital District of Bogotá, Colombia and lowest in provinces along the  
230 countries' land borders and Colombia's Pacific coast.

231 **Figure 4** visualizes the adjusted associations from the GAMM. Precipitation and  
232 wind speed were ORQ-transformed due to their skewed distributions. All six variables  
233 were highly statistically significantly associated with the outcome at the  $\alpha < 0.0001$  level.  
234 Temperature's effect (**Figure 4a.**) on district-level  $R_t$  was negligible in size, taking on a  
235 slight sinusoidal shape across the range of the variable's distribution. Precipitation (**Figure**  
236 **4b.**) showed a broadly lop-sided U-shaped association with  $R_t$  with the lowest predicted  
237 value in the mid-range and the highest at the upper extreme. The effect of soil moisture  
238 (**Figure 4c.**) was direct below a moisture value of approximately  $0.25 \text{ m}^3/\text{m}^3$ , forming a  
239 plateau above that threshold. Solar radiation's association (**Figure 4d.**) took the form of a  
240 descending arc with the inverse relationship most marked above a threshold of  
241 approximately  $700 \text{ KJ}/\text{m}^2$ , and the lowest predicted  $R_t$  for any of the hydrometeorological  
242 variables ( $R_t < 0.97$ ) occurring at the upper radiation extreme of close to  $1,500 \text{ KJ}/\text{m}^2$ .  
243 relative humidity (**Figure 4e.**) had the largest magnitude effect size of any

244 hydrometeorological variable, with increasing humidity mostly predicting decreasing  $R_t$   
245 (except for a plateau from around 70 – 80% relative humidity) and a difference in  
246 predicted  $R_t$  of approximately 0.05 between the extremes of the distribution. The  
247 association of wind speed with  $R_t$  (**Figure 4f.**) was small in magnitude and inverse in  
248 approximately the upper tercile of the ORQ-transformed distribution.

249 **Figure 5** shows the equivalent associations for the five continuous, non-  
250 hydrometeorological covariates and the coefficient estimates for the two comparison  
251 natural region categories relative to the “Coastal” reference category. Population density  
252 and health facility accessibility were ORQ-transformed.  $R_t$  increased with longer travel  
253 times to health facilities (**Figure 5a.**) from a value of 0.98 at the shortest time to just above  
254 1 in the upper half of the ORQ-transformed accessibility distribution. The government  
255 response index (**Figure 5b.**) had a negligible effect on SARS-CoV-2  $R_t$  and did not predict a  
256 value below 1 at any value. Population mobility (**Figure 5c.**) had a large, steep inverse  
257 association with population mobility below a percent change of 10% - meaning that  $R_t$   
258 increased when time spent in residences decreased little or increased relative to the pre-  
259 pandemic baseline - and a steady direct relationship above that threshold. The adjusted  
260 effects of the categorical natural region variable (**Figure 5d.**) were small and non-  
261 significant. Population density (**Figure 5e.**) had a direct association with the outcome with  
262 the most densely populated districts having an adjusted predicted  $R_t$  of >1.05, along with  
263 population mobility, one of the largest effect sizes observed in this analysis. Though  
264 statistically significant at the  $\alpha < 0.001$  level, the effect of population age structure (**Figure**  
265 **5f.**) was negligible consisting of a shallow, direct association within a short range of values  
266 between roughly 6% and 11% of the population aged over 65 years.

267 The final model explained 3.9% of the variance in the daily district SARS-CoV-2  $R_t$ ,  
268 compared to 2.6% by an equivalent model that excluded the hydrometeorological  
269 variables. ALEs for all variables were correspondingly small (**supplementary table S1**),  
270 with population density ranking highest in terms of contribution to  $R_t$  (ALE = 0.007)  
271 followed by solar radiation (ALE = 0.004), the highest ranking of the hydrometeorological  
272 variables. In models in which the highest ALE-ranked variables were dichotomized (**table**  
273 **S1**), differences in average predicted  $R_t$  for unit-dates on either side of variable-specific  
274 thresholds were also modest. Average adjusted  $R_t$  was 1% lower on days in which relative  
275 humidity was higher than 50%, compared to less humid days, but 1% higher when soil  
276 moisture was above  $0.1 \text{ m}^3/\text{m}^3$ . Days in which solar radiation exceeded  $1,000 \text{ KJ}/\text{m}^2$  had  
277 1.3% lower  $R_t$ , while the equivalent differences for districts in which average travel time to  
278 health facilities was more than half an hour and with population density of more than 100  
279 pop/ $\text{km}^2$  were, respectively, a 0.2% and a 0.4% increase, and on days in which mobility  
280 was reduced by 10% or more relative to pre-pandemic levels,  $R_t$  fell by an average of 0.3%

### Discussion:

281 The impacts of the COVID-19 pandemic on families, societies and institutions have  
282 been incalculable. Furthermore, the notable spatiotemporal variability in these impacts are  
283 seemingly not fully attributable to population susceptibility and health system factors  
284 alone<sup>58</sup>, implicating a potential influence of climate and environment on the transmission  
285 and survivability of SARS-CoV-2.<sup>12</sup> Early surveys of the evidence base highlighted a paucity  
286 of findings from the Global South and tropical regions, insufficient spatiotemporal scope  
287 and resolution in analyses, and a failure to account for confounding from non-  
288 climatological factors.<sup>12,20,22,59</sup> More recently, as attempts to track the pandemic have

289 coalesced into a wide variety of open datasets and online interfaces<sup>15,16,60</sup>, researchers have  
290 begun to address these knowledge gaps. Numerous recent studies have assessed effects on  
291 COVID-19 outcomes adjusting for multiple hydrometeorological variables<sup>35,61</sup> and other  
292 covariates including population density<sup>44</sup>, age structure<sup>62</sup>, NPI compliance<sup>33,63</sup> and  
293 government interventions<sup>64</sup>, while others have focused on single countries in equatorial  
294 regions<sup>65,66</sup> or multiple countries and locations spanning wide latitudes and both  
295 hemispheres.<sup>19,67,68</sup> This study is the first to bring together all these elements and at a high  
296 temporal resolution, multiple, cross-cutting spatial scales and for three neighboring  
297 countries that, despite including diverse populations and ecologies, share important  
298 commonalities in their pandemic experiences.

299         The ancestor of the SARS-CoV-2 index virus likely evolved through transmission  
300 among bats living in cool, dark, crowded caves.<sup>69,70</sup> The primary direct, person-to-person  
301 mode of transmission of the pathogen is via virus-laden aerosols exhaled by infectious  
302 individuals, while an indirect route via contact with contaminated fomites is thought to  
303 make a minor contribution.<sup>39,71</sup> Small-scale atmospheric conditions such as the  
304 temperature, pressure and humidity of the air affect the rates at which aerosolized  
305 respiratory droplets are formed, suspended, and dispersed and thus influence disease  
306 transmission in complex ways.<sup>31,34</sup> The negative association of relative humidity on SARS-  
307 CoV-2  $R_t$  identified here, among the largest absolute effect sizes of the hydrometeorological  
308 variables analyzed (though lower ranking by ALE), is consistent with one of the most  
309 widely documented of the disease's environmental sensitivities as well as current  
310 understanding regarding the virus' modes of transmission.<sup>34,72</sup> Whether quantified by  
311 absolute or relative measures, humidity has been shown to be an influential COVID-19



312 driver across many contexts<sup>37,73</sup>, with very dry atmospheric conditions appearing to favor  
313 transmission as has been shown for other respiratory<sup>74</sup> and non-respiratory<sup>54</sup> viruses.  
314 When expelled into dry air, respiratory microdroplets quickly shrink due to evaporation of  
315 their liquid content, allowing them to suspend aloft for longer and increasing their viral  
316 particle concentration.<sup>72,75</sup> relative humidity also has a separate U-shaped association with  
317 SARS-CoV-2 viability outside the human host, with its lowest viability occurring around  
318 60% air saturation and its highest at the extremes.<sup>34</sup> Competing effects of decreasing  
319 transmissibility and increasing viability in the upper humidity extreme are consistent with  
320 the plateau effect seen in these results at relative humidity >70%.

321         Though there is less consensus surrounding the effect of temperature, it is widely  
322 supposed to have an association similar to that of humidity, and indeed numerous studies  
323 have reported decreasing COVID-19 risk with increasing temperatures.<sup>61,62,73</sup> While this  
324 might at first glance seem to be at odds with the negligible and non-linear effect found in  
325 this analysis, comparisons with results specifically from other tropical settings suggest a  
326 more nuanced picture. One such study within a single season in Singapore<sup>66</sup> (January to  
327 April 2020) found a strong and significant direct association between temperature and  
328 COVID-19 case numbers, while another, also of a tropical, equatorial South American  
329 country (Brazil), found opposing effects of temperature in the March to May period (direct)  
330 compared to from June to August (inverse).<sup>65</sup> Another study of >400 cities across a wider  
331 range of latitudes in both the northern and southern hemispheres found a more complex,  
332 sinusoidally shaped relationship of temperature to transmission.<sup>19</sup> Since the domain of this  
333 analysis spanned only tropical latitudes either side of the equator, the null-like finding for  
334 temperature could plausibly be the result of competing effects between the two

335 hemispheres at different times over the year canceling each other out. However, marginal  
336 temperature effects predicted by multivariable models may be sensitive to the choice of  
337 humidity metric. The 400 city study adjusted for both relative humidity and absolute  
338 humidity<sup>19</sup>, while a study of US counties that adjusted temperature for specific humidity  
339 found still another complex and non-linear effect shape.<sup>18</sup> Supplementary **figure S1**  
340 compares the results of this model with an otherwise identical one that substituted specific  
341 humidity for relative humidity, and reveals a somewhat larger magnitude and direct effect  
342 of temperature in the specific humidity model. Temperature and specific humidity are  
343 closely related variables and exhibited multicollinearity in this dataset (a variance inflation  
344 for specific humidity of >10 in models that include temperature). Moreover, certain  
345 combinations of their values (e.g., low temperature with high specific humidity) simply do  
346 not occur naturally, so attempts to visualize effects of variations in one parameter while  
347 holding the other constant at its mean value are in some senses abstractions.

348         This analysis also identified a sizeable, inverse association of solar radiation on  
349 COVID-19 transmission consistent with numerous other studies<sup>37,44,68</sup>, most notably by Ma  
350 and colleagues, who also found this to be most pronounced above a threshold of ~1,000  
351 KJ/m<sup>2</sup>.<sup>18</sup> Such findings have been interpreted as reflecting the deactivating effect of  
352 sunlight on SARS-CoV-2 virions as has been observed in laboratory conditions either in  
353 aerosols<sup>76</sup>, on surfaces<sup>77,78</sup> or in mucus.<sup>79</sup> However, commentators have noted the difficulty  
354 of disentangling a direct effect of sunlight on the disease agent itself, from its confounding  
355 effect on host behaviors, such as rainy or cloudy weather driving people to congregate  
356 indoors, thereby increasing contact rates.<sup>54,68</sup> The fact that this effect was observed with  
357 adjustment for precipitation lends credibility to the supposed direct effect. Similarly, a

358 substantial effect of precipitation was observed with adjustment for population mobility,  
359 the highest predicted  $R_t$  occurring at the high end of the precipitation distribution, the  
360 lowest in the mid-range and a secondary peak on rainless days. Given the absence of a  
361 waterborne route of transmission, it is tempting to attribute this to residual, unobserved  
362 confounding from host behaviors that are incompletely captured by the mobility variable,  
363 rather than a direct, causal impact of rainfall on virus dispersal. However, the role of  
364 aerosolized particles from wastewater cannot be ruled out.<sup>80</sup> In Andean countries like  
365 these with wide inequities in sanitation coverage, many community-level environments are  
366 characterized by poor sewerage infrastructure<sup>81</sup>, where open wastewater canals serve the  
367 dual functions of drainage for rainwater runoff, and conveyance of effluent discharge from  
368 household latrines.<sup>82</sup> Such basic systems are easily overwhelmed by heavy rain events<sup>83</sup>,  
369 which may promote the creation of airborne contaminated bioaerosols in which infectious  
370 pathogens can remain viable, as has recently been demonstrated for several  
371 enteropathogens including viruses.<sup>84</sup>

372         Soil moisture was included as a negative control exposure yet its observed effect on  
373  $R_t$ , though small in absolute terms, was larger than that of government policy, population  
374 age structure and natural region. A possible explanation is that soil moisture serves as a  
375 proxy for the general moisture retention of all surfaces, and that virus particles expelled in  
376 aerosolized droplets may remain viable for longer if they settle on a surface that permits  
377 them to retain their surrounding moisture.<sup>85</sup> A small, inverse effect of wind speed above a  
378 threshold high in the distribution was identified, consistent with that identified by Clouston  
379 and colleagues.<sup>86</sup> While several other studies have also found inverse effects<sup>61,63</sup>, and still  
380 others have reported direct<sup>37,64,67</sup>, or negligible<sup>65</sup> effects of wind speed, it seems highly

381 plausible that faster wind speeds suppress transmission of SARS-CoV-2 in outdoor  
382 environments by increasing air circulation and dispersing infective aerosols away from  
383 susceptible individuals, much as ventilation does in indoor environments.<sup>80,86</sup>

384         The modeled effects of several non-hydrometeorological variables were consistent  
385 with the a priori hypotheses justifying their inclusion. Transmission was highest in densely  
386 populated districts, presumably due to higher contact rates, and lowest in districts with  
387 shorter travel time to health facilities, perhaps due to improved access to diagnosis and  
388 case management shortening the period between disease onset and isolation, or to  
389 unresolved confounding by latent urban status. On days in which time spent in residences  
390 was at least 10% more than was typical before the pandemic (a proxy for lockdown  
391 compliance),  $R_t$  was statistically significantly reduced, though by less than 1% and not to a  
392 level below 1, that if sustained would eventually bring transmission under control. The  
393 proportion of the population that was elderly had no substantial impact on  $R_t$ , likely  
394 because old age is less a risk factor for infectiousness or susceptibility to infection but  
395 rather for more severe COVID-19 outcomes once infected. It is striking that greater  
396 government response stringency had no effect on reducing  $R_t$  and even appeared to  
397 increase it slightly in the upper extreme. This may reflect that government response is  
398 often slow and largely reactive to surges in cases, or that it has little impact over and above  
399 that which is mediated by individual behavior change and compliance, factors captured by  
400 the mobility variable.

401         Besides those inherent to unit-level, ecological studies, this analysis is subject to  
402 further limitations. The high level of geographical disaggregation meant that there was an

403 inflated number of unit-dates on which zero cases were reported or that had  
404 uninterpretable  $R_t$  values. This meant that the distribution of the outcome values was  
405 narrower and the effect sizes smaller than those reported in other comparable analyses,  
406 some by almost an order of magnitude.<sup>19,35</sup> However, given that environmental conditions  
407 vary on a very small scale and that case data were available at such high resolution, this  
408 was deemed a justifiable tradeoff. The restriction of the analysis to the eight-month May to  
409 December period meant that it did not capture a full annual cycle of either weather  
410 conditions, or virus circulation, but was necessary to avoid having to account for vaccine  
411 and variant introduction.

412         In conclusion, COVID-19 transmission is sensitive to spatiotemporally varying  
413 hydrometeorological conditions in these three countries of tropical Andean South America,  
414 even after adjusting for other potential confounders including both static and time-varying  
415 variables, and at multiple cross-cutting scales. Dry atmospheric conditions of low humidity  
416 increased, and higher solar radiation decreased district-level SARS-CoV-2 reproduction  
417 numbers. While several commentators have cautioned that the effects on transmission of  
418 climatological conditions are likely to be modest compared to factors such as NPI  
419 compliance,<sup>59,68</sup> these findings in fact show their influence to be of a comparable magnitude  
420 in several cases and even greater than that of government response and population age  
421 structure. However, in absolute terms these effects, though significant, are modest and do  
422 not explain the excess disease burden experienced in some parts of this region during the  
423 first wave of the pandemic. As SARS-CoV-2 settles into indefinite endemic circulation, it  
424 may be feasible to incorporate weather monitoring into disease surveillance and early  
425 warning systems alongside other more costly activities such as wastewater or population

426 seroprevalence surveillance for anticipating case surges and allocating resources.  
427 Furthermore, population health interventions that encourage the public to exercise greater  
428 precautions on cloudy or dry days could also be considered. However, the high proportion  
429 of variance in COVID-19 transmission that remains unexplained even after accounting for  
430 population factors and NPIs (>96%) are striking, as are the negligible relative effect sizes of  
431 <2%, which are far surpassed by those of interventions such as vaccination (53 – 94%<sup>87</sup>)  
432 and mask wearing (19%<sup>88</sup>), all of which should serve as cause for caution when attempting  
433 to predict near-term changes in transmission risk.

#### 434 **Acknowledgements**

435 The research presented in this article was supported financially by a COVID-19  
436 supplement to NASA's Group on Earth Observations Work Programme (16-GE016-0047)  
437 to Drs. Zaitchik and Kosek. Additional funding was obtained from the Centers for Disease  
438 Control and Prevention (U01GH002270) to Dr. Kosek. The funders played no role in study  
439 design, the collection, analysis, and interpretation of data, the writing of the report, or the  
440 decision to submit the paper for publication. The findings and conclusions of this report are  
441 those of the authors and do not necessarily represent the official position of the funders.  
442 We are grateful to Ecuacovid, a project that provides a set of raw data extracted from  
443 reports on the national COVID-19 situation from Ecuadorian health authorities.

#### 444 **Author contributions**

445 JMC, MNK and BFZ conceived of the study. MNK and BFZ secured funding for the  
446 research. JMC, PH, NHN, YTC, HB, and DNM carried out data processing, analysis, and

447 visualization. MNK and AQ provided initial data. GHK, LMG, AQ and FSS provided  
448 interpretation and writing support.

#### 449 **Data availability**

450 The data and R code used in this analysis are provided in this GitHub repository  
451 [https://github.com/joshcolston/Colston COVID-19 in the Andes](https://github.com/joshcolston/Colston_COVID-19_in_the_Andes).

#### 452 **Declaration of interests**

453 The authors have no competing interests to disclose.

## 454 **References:**

- 455 1 Wang C, Horby PW, Hayden FG, Gao GF. A novel coronavirus outbreak of global health  
456 concern. *The Lancet* 2020; **395**: 470–3.
- 457 2 Onyeaka H, Anumudu CK, Al-Sharify ZT, Egele-Godswill E, Mbaegbu P. COVID-19  
458 pandemic: A review of the global lockdown and its far-reaching effects. *Science Progress*  
459 2021; **104**: 00368504211019854.
- 460 3 Center for Systems Science and Engineering (CSSE) at Johns Hopkins University (JHU).  
461 COVID-19 Dashboard. Johns Hopkins University & Medicine Coronavirus Resource  
462 Center. 2021. <https://coronavirus.jhu.edu/map.html> (accessed Oct 12, 2021).
- 463 4 Barber RM, Sorensen RJD, Pigott DM, *et al.* Estimating global, regional, and national daily  
464 and cumulative infections with SARS-CoV-2 through Nov 14, 2021: a statistical analysis.  
465 *The Lancet* 2022; published online April 8. DOI:10.1016/S0140-6736(22)00484-6.
- 466 5 The Lancet. COVID-19 in Latin America: a humanitarian crisis. *The Lancet* 2020; **396**:  
467 1463.
- 468 6 Wang H, Paulson KR, Pease SA, *et al.* Estimating excess mortality due to the COVID-19  
469 pandemic: a systematic analysis of COVID-19-related mortality, 2020–21. *The Lancet*  
470 2022; **0**. DOI:10.1016/S0140-6736(21)02796-3.
- 471 7 O'Reilly KM, Auzenberg M, Jafari Y, Liu Y, Flasche S, Lowe R. Effective transmission  
472 across the globe: the role of climate in COVID-19 mitigation strategies. *The Lancet*  
473 *Planetary Health* 2020; **4**: e172.
- 474 8 Audi A, Allbrahim M, Kaddoura M, Hijazi G, Yassine HM, Zaraket H. Seasonality of  
475 Respiratory Viral Infections: Will COVID-19 Follow Suit? *Frontiers in Public Health* 2020;  
476 **8**: 576.
- 477 9 Sajadi MM, Habibzadeh P, Vintzileos A, Shokouhi S, Miralles-Wilhelm F, Amoroso A.  
478 Temperature and Latitude Analysis to Predict Potential Spread and Seasonality for  
479 COVID-19. *SSRN Electronic Journal* 2020; published online March.  
480 DOI:10.2139/ssrn.3550308.
- 481 10 Carlson CJ, Gomez ACR, Bansal S, Ryan SJ. Misconceptions about weather and  
482 seasonality must not misguide COVID-19 response. *Nat Commun* 2020; **11**: 4312.
- 483 11 Meyer A, Sadler R, Faverjon C, Cameron AR, Bannister-Tyrrell M. Evidence That  
484 Higher Temperatures Are Associated With a Marginally Lower Incidence of COVID-19  
485 Cases. *Front Public Health* 2020; **8**: 367.
- 486 12 Zaitchik BF, Sweijd N, Shumake-Guillemot J, *et al.* A framework for research linking  
487 weather, climate and COVID-19. *Nat Commun* 2020; **11**: 5730.



- 488 13 Telenti A, Arvin A, Corey L, *et al.* After the pandemic: perspectives on the future  
489 trajectory of COVID-19. *Nature* 2021; **596**: 495–504.
- 490 14 Chen S, Prettner K, Kuhn M, *et al.* Climate and the spread of COVID-19. *Sci Rep* 2021;  
491 **11**: 9042.
- 492 15 Dong E, Du H, Gardner L. An interactive web-based dashboard to track COVID-19 in  
493 real time. *The Lancet Infectious Diseases* 2020; **20**: 533–4.
- 494 16 Badr HS, Zaitchik BF, Kerr GH, *et al.* Unified real-time environmental-  
495 epidemiological data for multiscale modeling of the COVID-19 pandemic. *medRxiv* 2021; :  
496 2021.05.05.21256712.
- 497 17 Colston JM, Ahmed T, Mahopo C, *et al.* Evaluating meteorological data from weather  
498 stations, and from satellites and global models for a multi-site epidemiological study.  
499 *Environmental Research* 2018; **165**: 91–109.
- 500 18 Ma Y, Pei S, Shaman J, Dubrow R, Chen K. Role of meteorological factors in the  
501 transmission of SARS-CoV-2 in the United States. *Nat Commun* 2021; **12**: 3602.
- 502 19 Sera F, Armstrong B, Abbott S, *et al.* A cross-sectional analysis of meteorological  
503 factors and SARS-CoV-2 transmission in 409 cities across 26 countries. *Nat Commun*  
504 2021; **12**: 5968.
- 505 20 Quintana AV, Clemons M, Hoevermeyer K, Liu A, Balbus J. A Descriptive Analysis of  
506 the Scientific Literature on Meteorological and Air Quality Factors and COVID-19.  
507 *GeoHealth* 2021; **5**: e2020GH000367.
- 508 21 Mecenas P, Bastos RT da RM, Vallinoto ACR, Normando D. Effects of temperature  
509 and humidity on the spread of COVID-19: A systematic review. *PLOS ONE* 2020; **15**:  
510 e0238339.
- 511 22 Kerr GH, Badr HS, Gardner LM, Perez-Saez J, Zaitchik BF. Associations between  
512 meteorology and COVID-19 in early studies: Inconsistencies, uncertainties, and  
513 recommendations. *One Health* 2021; **12**: 100225.
- 514 23 Instituto Nacional de Salud Colombiano. Casos positivos de COVID-19 en Colombia.  
515 Datos Abiertos Colombia. 2021; published online Oct 12.  
516 [https://www.datos.gov.co/en/Salud-y-Proteccion-Social/Casos-positivos-de-COVID-19-](https://www.datos.gov.co/en/Salud-y-Proteccion-Social/Casos-positivos-de-COVID-19-en-Colombia/gt2j-8ykr)  
517 [en-Colombia/gt2j-8ykr](https://www.datos.gov.co/en/Salud-y-Proteccion-Social/Casos-positivos-de-COVID-19-en-Colombia/gt2j-8ykr) (accessed Oct 12, 2021).
- 518 24 Andrés N. Robalino, Carlos Oporto, Francisco Hurtado, Serge Bibauw. Ecuacovid.  
519 Andrab S.A., 2021 <https://github.com/andrab/ecuacovid> (accessed Oct 12, 2021).
- 520 25 Ministerio de Salud Peruano. Plataforma Nacional de Datos Abiertos. Plataforma  
521 Nacional de Datos Abiertos. <https://www.datosabiertos.gob.pe/dataset/casos-positivos->

- 522 por-covid-19-ministerio-de-salud-minsa/resource/690e57a6-a465-47d8-86fd  
523 (accessed Oct 12, 2021).
- 524 26 Abbott S, Hellewell J, Thompson RN, *et al.* Estimating the time-varying reproduction  
525 number of SARS-CoV-2 using national and subnational case counts. *Wellcome Open*  
526 *Research* 2020 5:112 2020; **5**: 112.
- 527 27 Center for International Earth Science Information Network (CIESIN). Gridded  
528 Population of the World, Version 4 (GPWv4): Population Count. 2016.  
529 <https://sedac.ciesin.columbia.edu/data/collection/gpw-v4>.
- 530 28 Xia Y, Mitchell K, Ek M, *et al.* Continental-scale water and energy flux analysis and  
531 validation for the North American Land Data Assimilation System project phase 2  
532 (NLDAS-2): 1. Intercomparison and application of model products. *Journal of Geophysical*  
533 *Research Atmospheres* 2012; **117**: D03109.
- 534 29 Hersbach H, Bell B, Berrisford P, *et al.* The ERA5 global reanalysis. *Quarterly Journal*  
535 *of the Royal Meteorological Society* 2020; **146**: 1999–2049.
- 536 30 Tarek M, Brissette FP, Arsenault R. Evaluation of the ERA5 reanalysis as a potential  
537 reference dataset for hydrological modelling over North America. *Hydrology and Earth*  
538 *System Sciences* 2020; **24**: 2527–44.
- 539 31 Colston JM, Zaitchik B, Kang G, *et al.* Use of earth observation-derived  
540 hydrometeorological variables to model and predict rotavirus infection (MAL-ED): a  
541 multisite cohort study. *The Lancet Planetary Health* 2019; **3**: S2542-5196.
- 542 32 Morris DH, Yinda KC, Gamble A, *et al.* Mechanistic theory predicts the effects of  
543 temperature and humidity on inactivation of SARS-CoV-2 and other enveloped viruses.  
544 *eLife* 2021; **10**: e65902.
- 545 33 Rubin D, Huang J, Fisher BT, *et al.* Association of Social Distancing, Population  
546 Density, and Temperature With the Instantaneous Reproduction Number of SARS-CoV-2  
547 in Counties Across the United States. *JAMA Netw Open* 2020; **3**: e2016099.
- 548 34 Ahlawat A, Wiedensohler A, Mishra SK. An Overview on the Role of Relative  
549 Humidity in Airborne Transmission of SARS-CoV-2 in Indoor Environments. *Aerosol Air*  
550 *Qual Res* 2020; **20**: 1856–61.
- 551 35 Y M, S P, J S, R D, K C. Role of air temperature and humidity in the transmission of  
552 SARS-CoV-2 in the United States. *medRxiv : the preprint server for health sciences* 2020.  
553 DOI:10.1101/2020.11.13.20231472.
- 554 36 Shenoy A, Sharma B, Xu G, Kapoor R, Rho HA, Sangha K. God is in the rain: The  
555 impact of rainfall-induced early social distancing on COVID-19 outbreaks. *J Health Econ*  
556 2022; **81**: 102575.

- 557 37 Majumder P, Ray PP. A systematic review and meta-analysis on correlation of  
558 weather with COVID-19. *Sci Rep* 2021; **11**: 10746.
- 559 38 Eleanor Sanderson, Corrie Macdonald-Wallis, George Davey Smith. Negative control  
560 exposure studies in the presence of measurement error: implications for attempted  
561 effect estimate calibration | *International Journal of Epidemiology* | Oxford Academic.  
562 <https://academic.oup.com/ije/article/47/2/587/4568999> (accessed Oct 12, 2021).
- 563 39 Karia R, Gupta I, Khandait H, Yadav A, Yadav A. COVID-19 and its Modes of  
564 Transmission. *SN Comprehensive Clinical Medicine* 2020; **2**: 1798–801.
- 565 40 Fernandes JSC, da Silva RS, Silva AC, Villela DC, Mendonça VA, Lacerda ACR. Altitude  
566 conditions seem to determine the evolution of COVID-19 in Brazil. *Sci Rep* 2021; **11**:  
567 4402.
- 568 41 INEI/Perú IN de E e I-. Perú Encuesta Demográfica y de Salud Familiar - ENDES  
569 2012. 2013; published online April 1.  
570 <https://www.dhsprogram.com/publications/publication-FR284-DHS-Final-Reports.cfm>  
571 (accessed Oct 12, 2021).
- 572 42 This is Ecuador. Ecuador y sus 4 regiones: Descubre su geografía. This Is Ecuador -  
573 The Most Complete Guide to Ecuador. 2021; published online Jan 13.  
574 <https://www.thisisecuador.com/blog/ecuador-y-sus-4-regiones-descubre-su-geografia/>  
575 (accessed Oct 12, 2021).
- 576 43 Instituto Geografico Agustin Codazzi. Natural regions of Colombia. Geoportal. 2014;  
577 published online Oct 20.  
578 [http://geoportal.igac.gov.co/mapas\\_de\\_colombia/IGAC/Tematicos2012/RegionesGeogr  
579 aficas.pdf](http://geoportal.igac.gov.co/mapas_de_colombia/IGAC/Tematicos2012/RegionesGeograficas.pdf) (accessed Oct 12, 2021).
- 580 44 Smith TP, Flaxman S, Gallinat AS, *et al.* Temperature and population density  
581 influence SARS-CoV-2 transmission in the absence of nonpharmaceutical interventions.  
582 *Proceedings of the National Academy of Sciences* 2021; **118**.  
583 DOI:10.1073/PNAS.2019284118.
- 584 45 Tatem AJ. WorldPop, open data for spatial demography. *Scientific Data* 2017; **4**:  
585 170004.
- 586 46 Mueller AL, McNamara MS, Sinclair DA. Why does COVID-19 disproportionately  
587 affect older people? *Aging (Albany NY)* 2020; **12**: 9959–81.
- 588 47 Weiss DJ, Nelson A, Vargas-Ruiz CA, *et al.* Global maps of travel time to healthcare  
589 facilities. *Nature Medicine* 2020 **26**:12 2020; **26**: 1835–8.
- 590 48 Rice BL, Annapragada A, Baker RE, *et al.* Variation in SARS-CoV-2 outbreaks across  
591 sub-Saharan Africa. *Nature Medicine* 2021 **27**:3 2021; **27**: 447–53.

- 592 49 Haug N, Geyrhofer L, Londei A, *et al.* Ranking the effectiveness of worldwide COVID-  
593 19 government interventions. *Nature Human Behaviour* 2020 4:12 2020; **4**: 1303–12.
- 594 50 Hale T, Angrist N, Goldszmidt R, *et al.* A global panel database of pandemic policies  
595 (Oxford COVID-19 Government Response Tracker). *Nature Human Behaviour* 2021 5:4  
596 2021; **5**: 529–38.
- 597 51 Morales-Vives F, Dueñas J-M, Ferrando PJ, Vigil-Colet A, Varea MD. Compliance with  
598 pandemic COMmands Scale (COCOS): The relationship between compliance with COVID-  
599 19 measures and sociodemographic and attitudinal variables. *PLOS ONE* 2022; **17**:  
600 e0262698.
- 601 52 Uddin S, Imam T, Khushi M, Khan A, Ali M. How did socio-demographic status and  
602 personal attributes influence compliance to COVID-19 preventive behaviours during the  
603 early outbreak in Japan? Lessons for pandemic management. *Pers Individ Dif* 2021; **175**:  
604 110692.
- 605 53 Google LLC. Google COVID-19 Community Mobility Reports.  
606 <https://www.google.com/covid19/mobility?hl=en> (accessed April 28, 2022).
- 607 54 Colston JM, Zaitchik BF, Badr HS, *et al.* Associations Between Eight Earth  
608 Observation-Derived Climate Variables and Enteropathogen Infection: An Independent  
609 Participant Data Meta-Analysis of Surveillance Studies With Broad Spectrum Nucleic  
610 Acid Diagnostics. *Geohealth* 2022; **6**: e2021GH000452.
- 611 55 R Core Team. R: A language and environment for statistical computing. 2020.
- 612 56 StataCorp. Stata Statistical Software: Release 16. 2019.
- 613 57 ESRI. ArcGIS Desktop: Release 10.8. 2019.
- 614 58 Sorci G, Faivre B, Morand S. Explaining among-country variation in COVID-19 case  
615 fatality rate. *Sci Rep* 2020; **10**: 18909.
- 616 59 Smit AJ, Fitchett JM, Engelbrecht FA, Scholes RJ, Dzhivhuho G, Sweijid NA. Winter Is  
617 Coming: A Southern Hemisphere Perspective of the Environmental Drivers of SARS-CoV-  
618 2 and the Potential Seasonality of COVID-19. *Int J Environ Res Public Health* 2020; **17**:  
619 E5634.
- 620 60 Wahltinez O, Cheung A, Alcantara R, *et al.* COVID-19 Open-Data a global-scale  
621 spatially granular meta-dataset for coronavirus disease. *Sci Data* 2022; **9**: 162.
- 622 61 Yuan J, Wu Y, Jing W, *et al.* Association between meteorological factors and daily  
623 new cases of COVID-19 in 188 countries: A time series analysis. *Sci Total Environ* 2021;  
624 **780**: 146538.

- 625 62 Landier J, Paireau J, Rebaudet S, *et al.* Cold and dry winter conditions are associated  
626 with greater SARS-CoV-2 transmission at regional level in western countries during the  
627 first epidemic wave. *Sci Rep* 2021; **11**: 12756.
- 628 63 Ganslmeier M, Furceri D, Ostry JD. The impact of weather on COVID-19 pandemic.  
629 *Sci Rep* 2021; **11**: 22027.
- 630 64 Ledebur K, Kaleta M, Chen J, *et al.* Meteorological factors and non-pharmaceutical  
631 interventions explain local differences in the spread of SARS-CoV-2 in Austria. *PLoS*  
632 *Comput Biol* 2022; **18**: e1009973.
- 633 65 Yin C, Zhao W, Pereira P. Meteorological factors' effects on COVID-19 show  
634 seasonality and spatiality in Brazil. *Environ Res* 2022; **208**: 112690.
- 635 66 Lorenzo JSL, Tam WWS, Seow WJ. Association between air quality, meteorological  
636 factors and COVID-19 infection case numbers. *Environmental Research* 2021; **197**:  
637 111024.
- 638 67 Sarkodie SA, Owusu PA. Impact of meteorological factors on COVID-19 pandemic:  
639 Evidence from top 20 countries with confirmed cases. *Environmental Research* 2020;  
640 **191**: 110101.
- 641 68 Carleton T, Cornetet J, Huybers P, Meng KC, Proctor J. Global evidence for ultraviolet  
642 radiation decreasing COVID-19 growth rates. *Proc Natl Acad Sci U S A* 2021; **118**:  
643 e2012370118.
- 644 69 Temmam S, Vongphayloth K, Baquero E, *et al.* Bat coronaviruses related to SARS-  
645 CoV-2 and infectious for human cells. *Nature* 2022; **604**: 330–6.
- 646 70 MacLean OA, Lytras S, Weaver S, *et al.* Natural selection in the evolution of SARS-  
647 CoV-2 in bats created a generalist virus and highly capable human pathogen. *PLOS*  
648 *Biology* 2021; **19**: e3001115.
- 649 71 Zhang R, Li Y, Zhang AL, Wang Y, Molina MJ. Identifying airborne transmission as the  
650 dominant route for the spread of COVID-19. *Proceedings of the National Academy of*  
651 *Sciences* 2020; **117**: 14857–63.
- 652 72 Hosseini V. SARS-CoV-2 Virulence: Interplay of Floating Virus-Laden Particles,  
653 Climate, and Humans. *Advanced Biosystems* 2020; **4**: 2000105.
- 654 73 Paraskevis D, Kostaki EG, Alygizakis N, *et al.* A review of the impact of weather and  
655 climate variables to COVID-19: In the absence of public health measures high  
656 temperatures cannot probably mitigate outbreaks. *Sci Total Environ* 2021; **768**: 144578.
- 657 74 Lin K, Marr LC. Humidity-Dependent Decay of Viruses, but Not Bacteria, in Aerosols  
658 and Droplets Follows Disinfection Kinetics. *Environ Sci Technol* 2020; **54**: 1024–32.



- 659 75 Kumar P, Morawska L. Could fighting airborne transmission be the next line of  
660 defence against COVID-19 spread? *City and Environment Interactions* 2019; **4**: 100033.
- 661 76 Dabisch P, Schuit M, Herzog A, *et al.* The influence of temperature, humidity, and  
662 simulated sunlight on the infectivity of SARS-CoV-2 in aerosols. *Aerosol Science and*  
663 *Technology* 2021; **55**: 142–53.
- 664 77 Raiteux J, Eschlimann M, Marangon A, *et al.* Inactivation of SARS-CoV-2 by Simulated  
665 Sunlight on Contaminated Surfaces. *Microbiol Spectr* 2021; **9**: e0033321.
- 666 78 Ratnesar-Shumate S, Williams G, Green B, *et al.* Simulated Sunlight Rapidly  
667 Inactivates SARS-CoV-2 on Surfaces. *The Journal of Infectious Diseases* 2020; **222**: 214–  
668 22.
- 669 79 Sloan A, Cutts T, Griffin BD, *et al.* Simulated sunlight decreases the viability of SARS-  
670 CoV-2 in mucus. *PLOS ONE* 2021; **16**: e0253068.
- 671 80 Senatore V, Zarra T, Buonerba A, *et al.* Indoor versus outdoor transmission of SARS-  
672 COV-2: environmental factors in virus spread and underestimated sources of risk.  
673 *EuroMediterr J Environ Integr* 2021; **6**: 30.
- 674 81 French MA, Fiona Barker S, Taruc RR, *et al.* A planetary health model for reducing  
675 exposure to faecal contamination in urban informal settlements: Baseline findings from  
676 Makassar, Indonesia. *Environment International* 2021; **155**: 106679.
- 677 82 Berendes DM, Leon JS, Kirby AE, *et al.* Associations between open drain flooding and  
678 pediatric enteric infections in the MAL-ED cohort in a low-income, urban neighborhood  
679 in Vellore, India. *BMC Public Health* 2019; **19**: 926.
- 680 83 Berendes DM, de Mondesert L, Kirby AE, *et al.* Variation in E. coli concentrations in  
681 open drains across neighborhoods in Accra, Ghana: The influence of onsite sanitation  
682 coverage and interconnectedness of urban environments. *int j hyg environ health* 2019;  
683 **224**: 113433–0.
- 684 84 Ginn O, Rocha-Melogno L, Bivins A, *et al.* Detection and Quantification of Enteric  
685 Pathogens in Aerosols Near Open Wastewater Canals in Cities with Poor Sanitation.  
686 *Environ Sci Technol* 2021; published online Oct 20. DOI:10.1021/acs.est.1c05060.
- 687 85 Colston JM. Seasonality and Hydrometeorological Predictors of Rotavirus Infection  
688 in an Eight-Site Birth Cohort Study: Implications for Modeling and Predicting Pathogen-  
689 Specific Enteric Disease Burden. 2018.  
690 <http://jhir.library.jhu.edu/handle/1774.2/61085>.
- 691 86 Clouston SAP, Morozova O, Meliker JR. A wind speed threshold for increased  
692 outdoor transmission of coronavirus: an ecological study. *BMC Infectious Diseases* 2021;  
693 **21**: 1194.

- 694 87 Andrews N, Tessier E, Stowe J, *et al.* Duration of Protection against Mild and Severe  
695 Disease by Covid-19 Vaccines. *New England Journal of Medicine* 2022; **386**: 340–50.
- 696 88 Leech G, Rogers-Smith C, Monrad JT, *et al.* Mask wearing in community settings  
697 reduces SARS-CoV-2 transmission. *Proceedings of the National Academy of Sciences* 2022;  
698 **119**: e2119266119.
- 699

## Tables:

| <b>Table 1: Definitions of variables used in the analysis</b> |                                                                    |                                |                                                                                                                                                                                      |                                                                                                                                       |
|---------------------------------------------------------------|--------------------------------------------------------------------|--------------------------------|--------------------------------------------------------------------------------------------------------------------------------------------------------------------------------------|---------------------------------------------------------------------------------------------------------------------------------------|
| <b>Variable</b>                                               | <b>Units/<br/>Categories</b>                                       | <b>Temporal<br/>resolution</b> | <b>Spatial resolution</b>                                                                                                                                                            | <b>Source</b>                                                                                                                         |
| <b>COVID-19 diagnoses</b>                                     | Positive cases                                                     | Daily total                    | Colombia: 2 <sup>nd</sup> Administrative Level (Municipalities)<br>Ecuador: 2 <sup>nd</sup> Administrative level (Cantons)<br>Peru: 3 <sup>rd</sup> Administrative level (Districts) | National Institute of Health of Colombia <sup>23</sup><br><br>Ecuacovid <sup>24</sup><br><br>Ministry of Health of Peru <sup>25</sup> |
| <b>Effective reproduction number (<math>R_t</math>)</b>       | Secondary cases per index case                                     | Daily                          | District                                                                                                                                                                             | EpiNow2 <sup>26</sup>                                                                                                                 |
| <b>Government policy response stringency</b>                  | %                                                                  | Daily                          | National                                                                                                                                                                             | OxCGRT <sup>50</sup>                                                                                                                  |
| <b>Healthcare accessibility</b>                               | Minutes' travel time to nearest health facility by motor transport | Static (2020)                  | District-level average                                                                                                                                                               | Malaria Atlas Project <sup>47</sup>                                                                                                   |
| <b>Natural region</b>                                         | <u>Coastal</u> , Highland, Interior                                | Static                         | District                                                                                                                                                                             | Various <sup>41-43</sup>                                                                                                              |
| <b>Population age structure</b>                               | % population $\geq 65$ years                                       | Static (2020)                  | District-level average                                                                                                                                                               | WorldPop <sup>45</sup>                                                                                                                |
| <b>Population density</b>                                     | Population/1km <sup>2</sup>                                        |                                |                                                                                                                                                                                      |                                                                                                                                       |
| <b>Population mobility: residential</b>                       | % Change relative to baseline                                      | Daily                          | Province                                                                                                                                                                             | Google <sup>53</sup>                                                                                                                  |
| <b>Air temperature</b>                                        | °C                                                                 |                                |                                                                                                                                                                                      |                                                                                                                                       |
| <b>Precipitation</b>                                          | mm                                                                 |                                |                                                                                                                                                                                      |                                                                                                                                       |
| <b>Specific humidity</b>                                      | g/kg                                                               | Daily average                  | District-level average                                                                                                                                                               | ERA5 <sup>29</sup>                                                                                                                    |
| <b>Soil moisture</b>                                          | m <sup>3</sup> /m <sup>3</sup>                                     |                                |                                                                                                                                                                                      |                                                                                                                                       |
| <b>Solar radiation</b>                                        | KJ/m <sup>2</sup>                                                  |                                |                                                                                                                                                                                      |                                                                                                                                       |
| <b>Wind speed</b>                                             | m/s                                                                |                                |                                                                                                                                                                                      |                                                                                                                                       |



**Figure 1:** District-level geographical distribution of cumulative reported COVID-19 cases and estimated SARS-CoV-2 reproduction number ( $R_t$ ) in Colombia, Ecuador, and Peru (May 1<sup>st</sup> – December 31<sup>st</sup>, 2020).

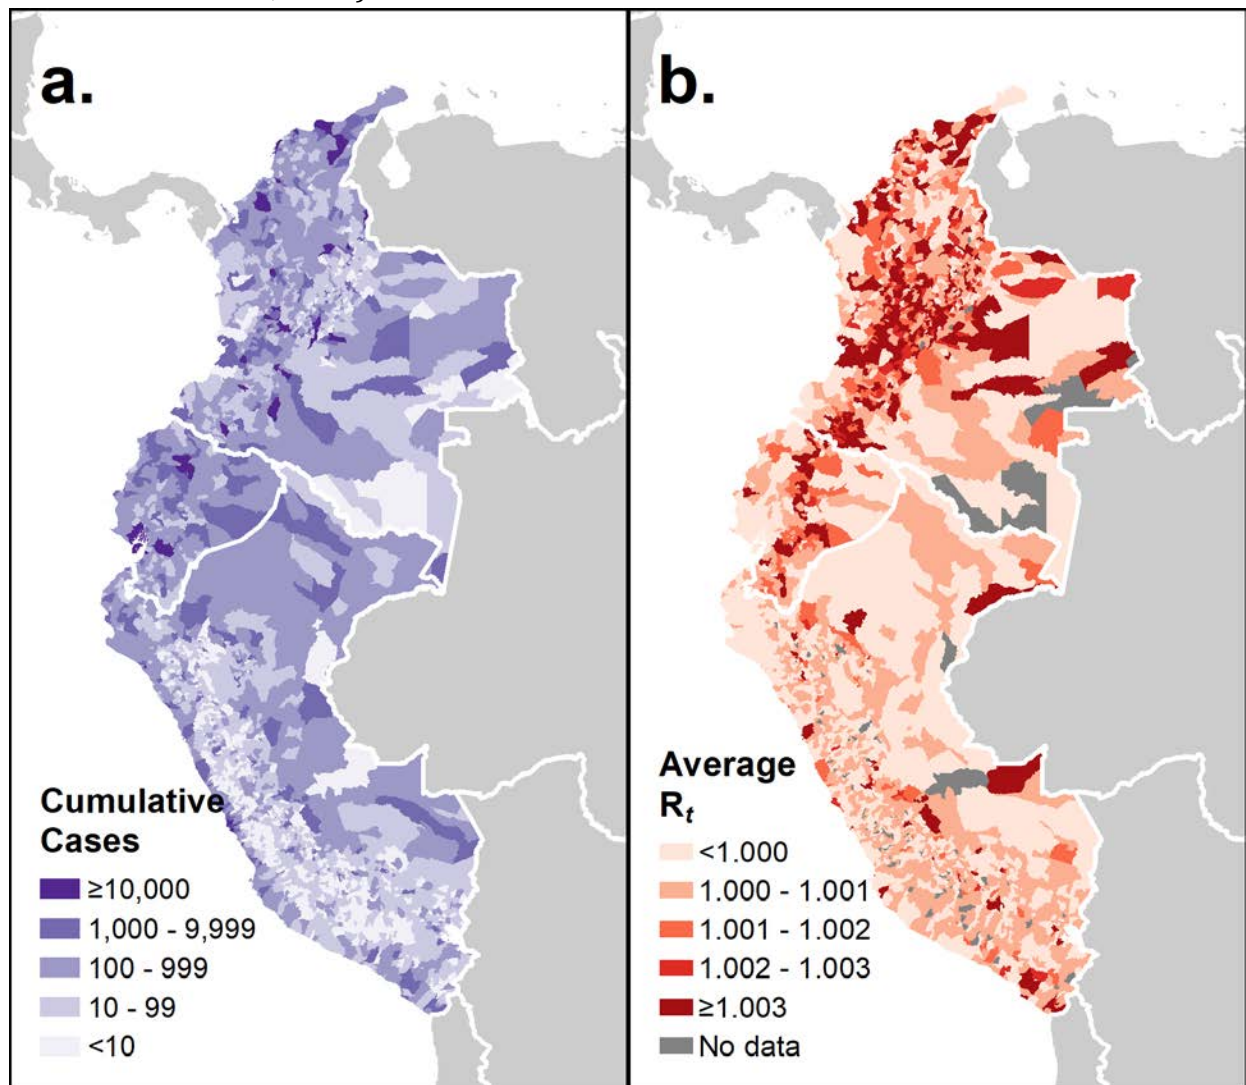

**Figure 2:** District-level geographical distribution of six hydrometeorological variables in Colombia, Ecuador, and Peru (mean of daily averages May 1<sup>st</sup> – December 31<sup>st</sup>, 2020).

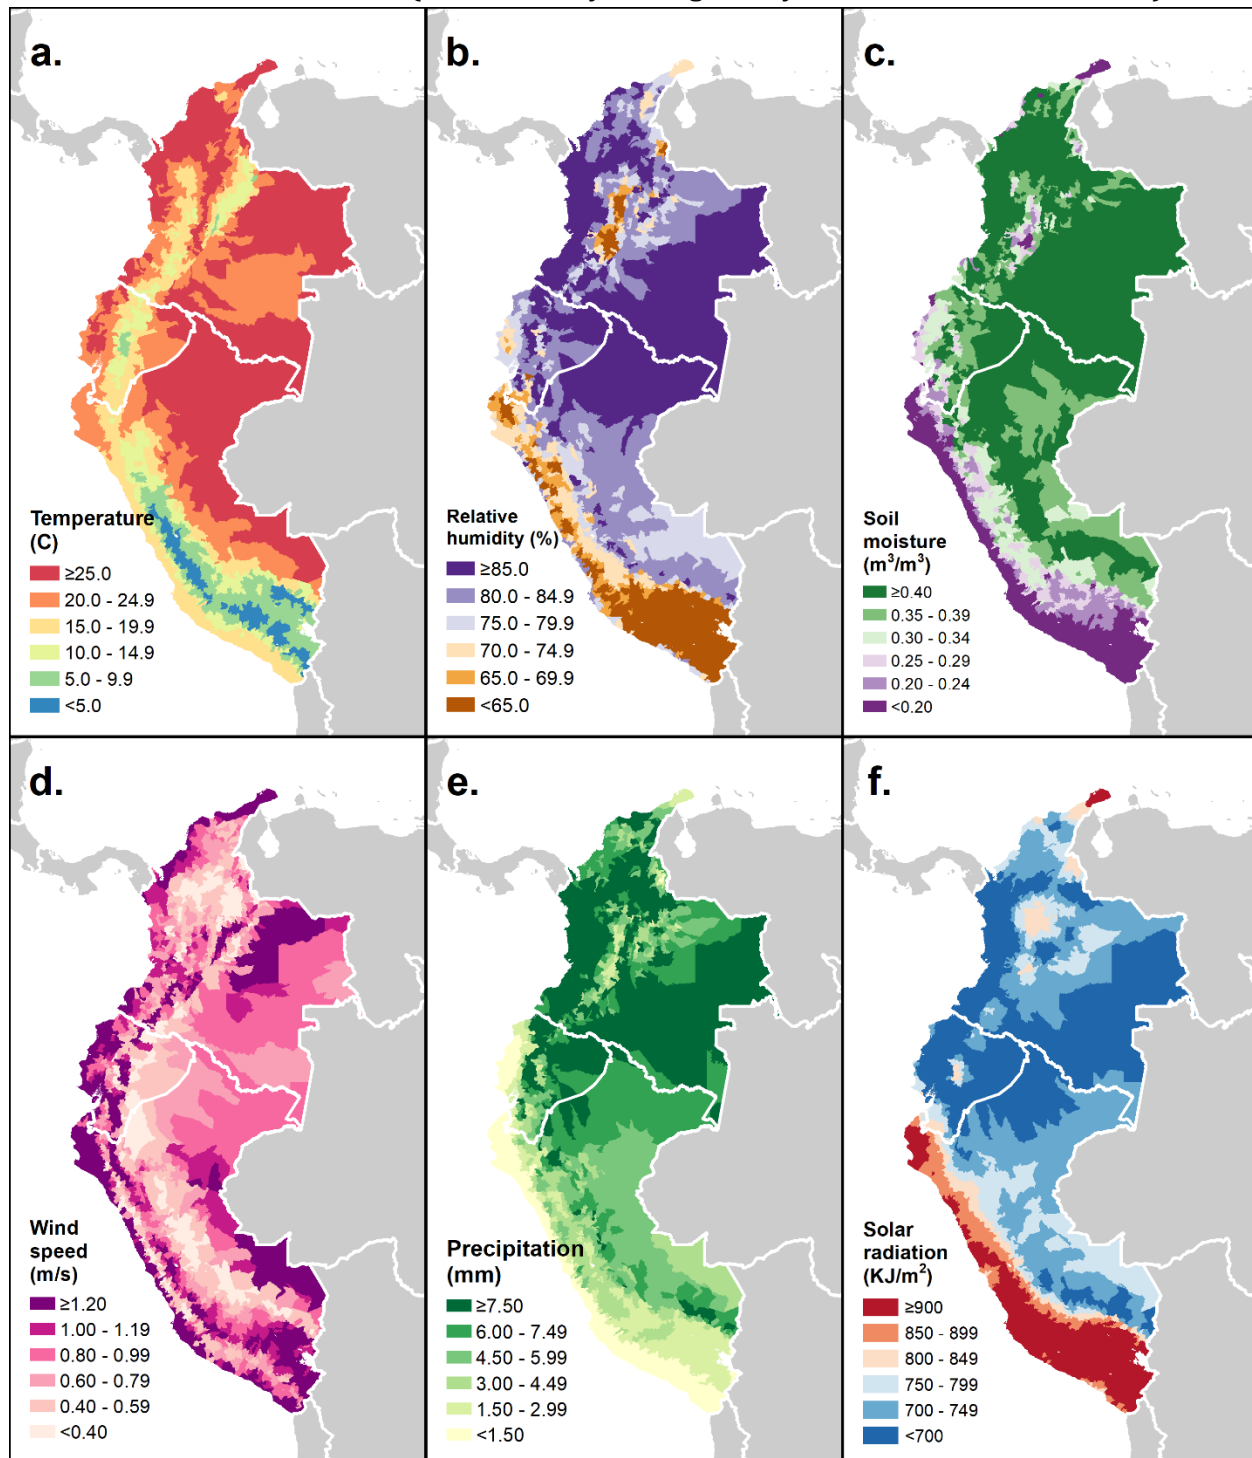

**Figure 3:** District-level geographical distribution of 6 covariate variables in Colombia, Ecuador, and Peru (May 1<sup>st</sup> – December 31<sup>st</sup>, 2020).

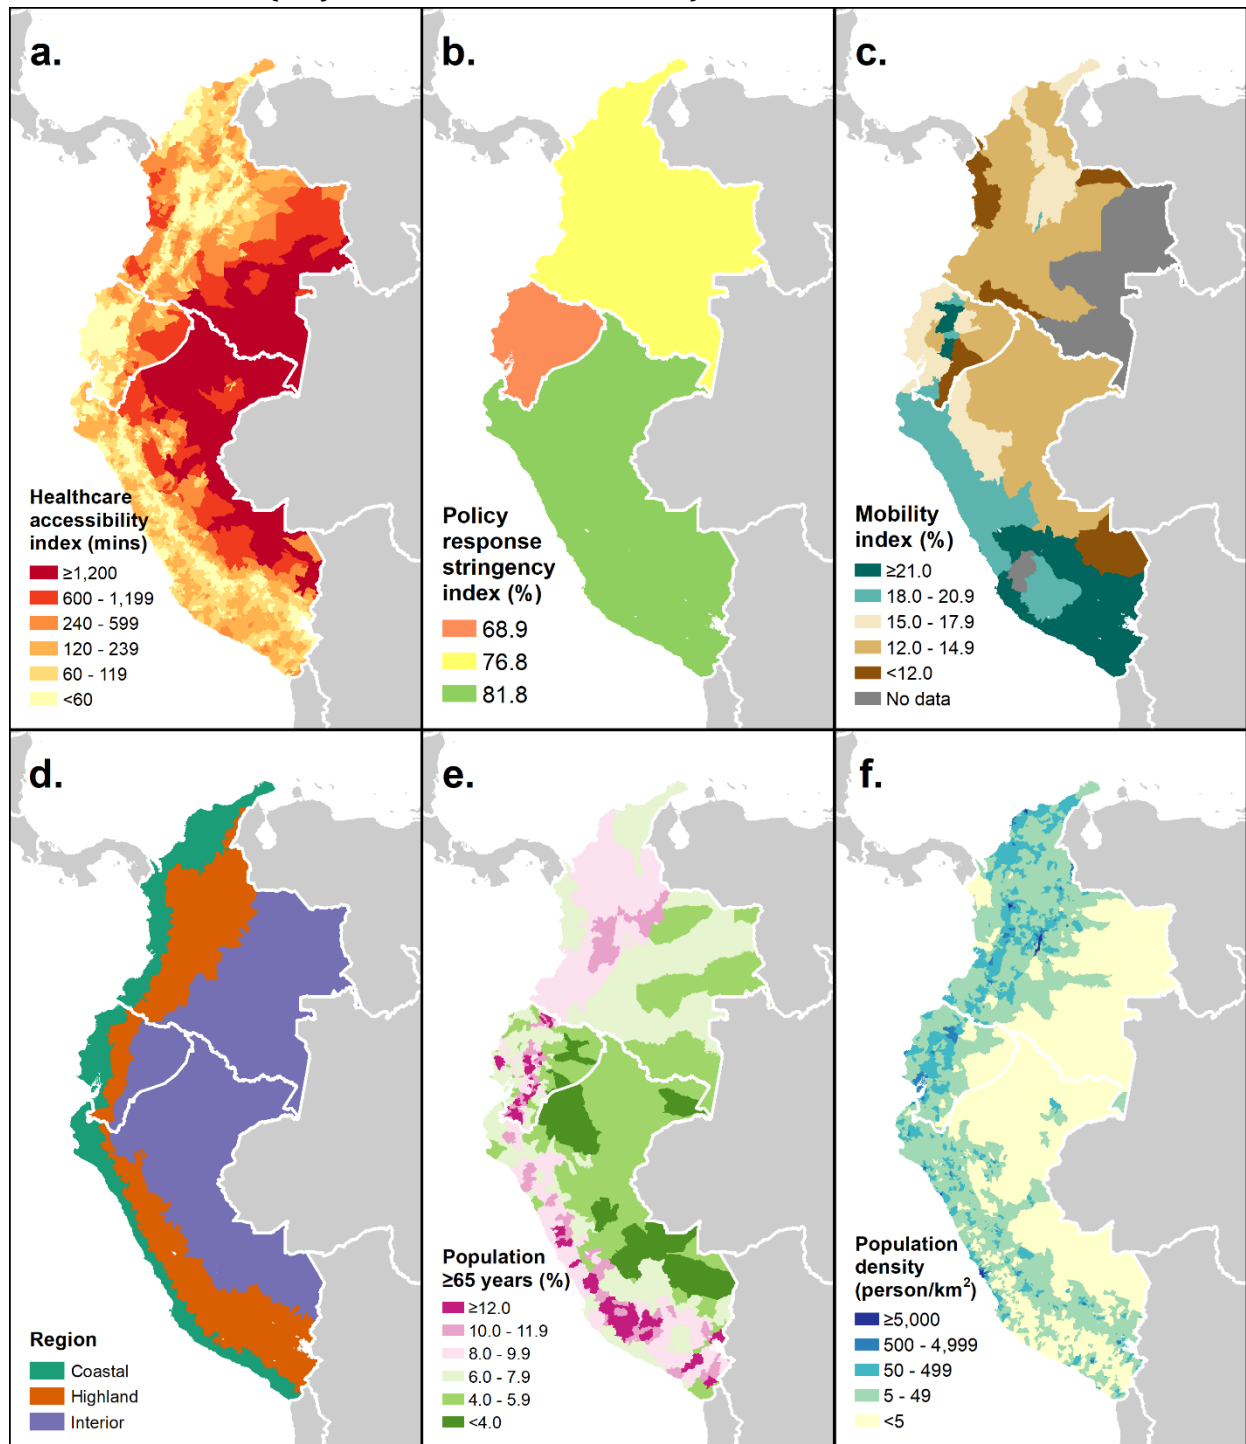

**Figure 4:** Adjusted associations between 6 hydrometeorological variables and daily COVID-19 reproduction numbers  $R_t$  values predicted by generalized additive mixed effects model.

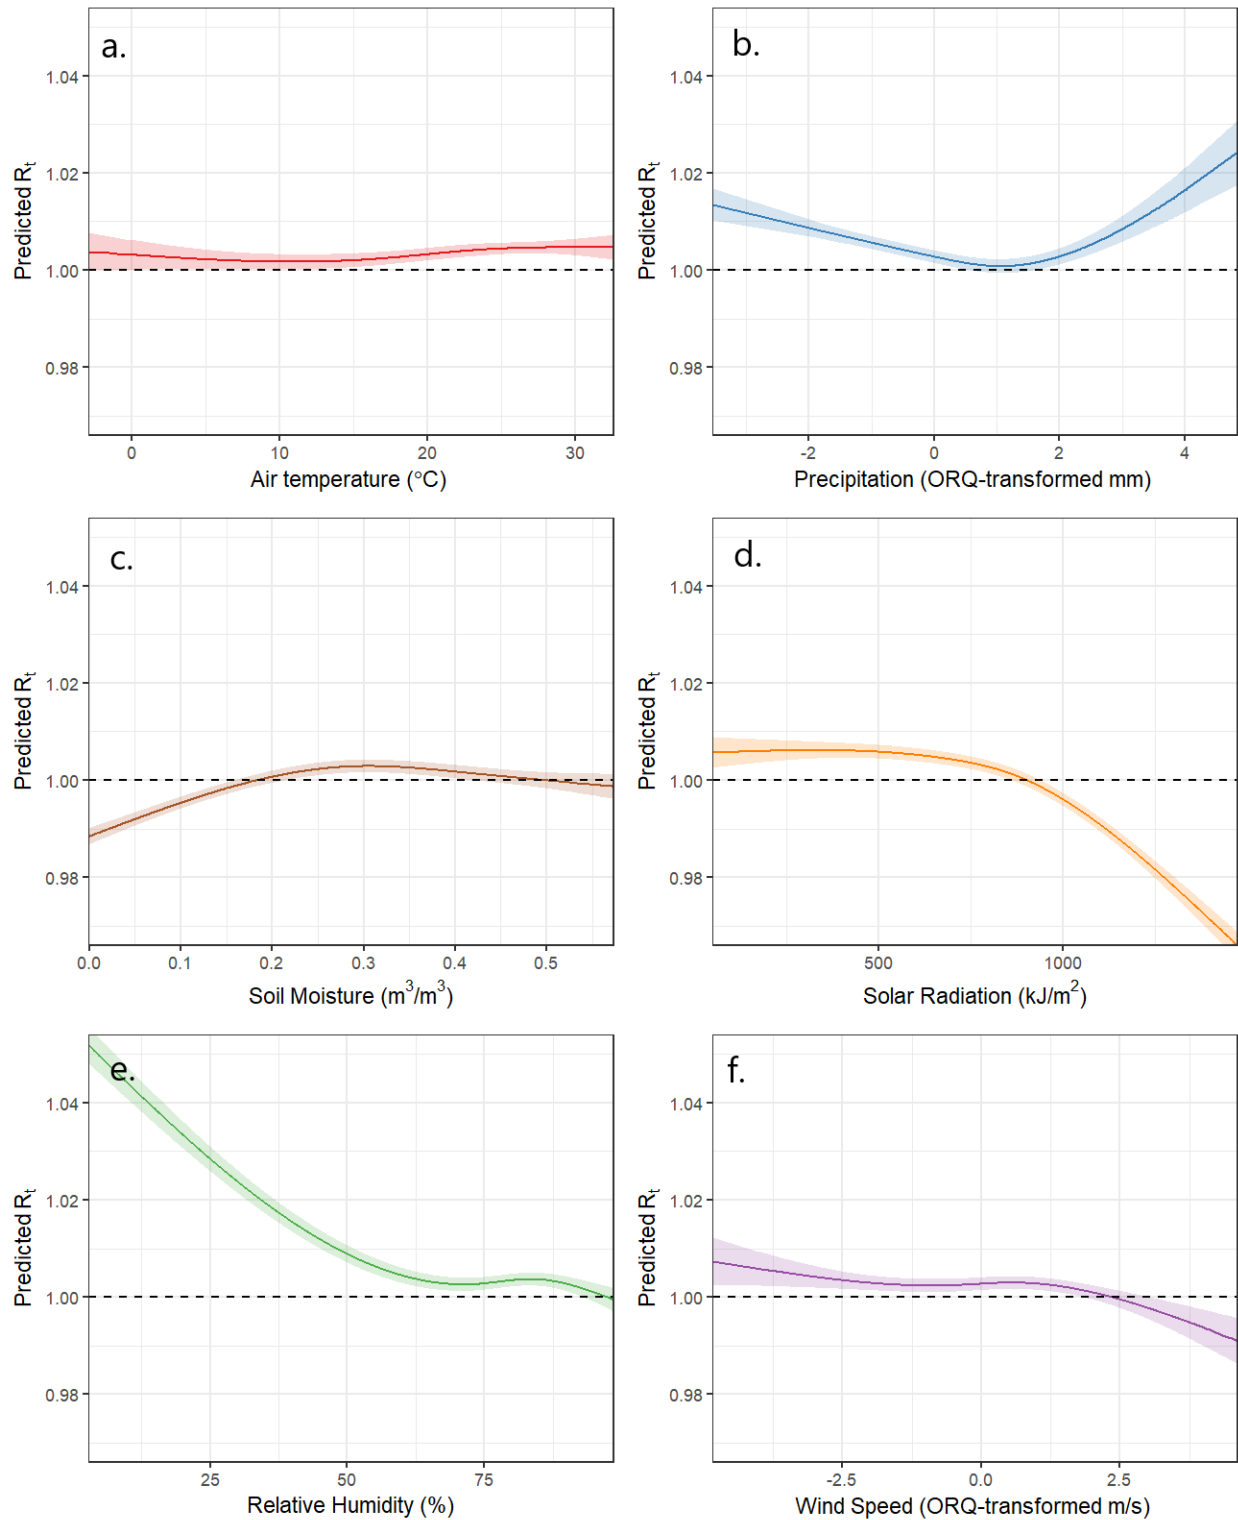

**Figure 5:** Adjusted associations between 6 covariate variables and daily COVID-19 reproduction numbers  $R_t$  values predicted by generalized additive mixed effects model.

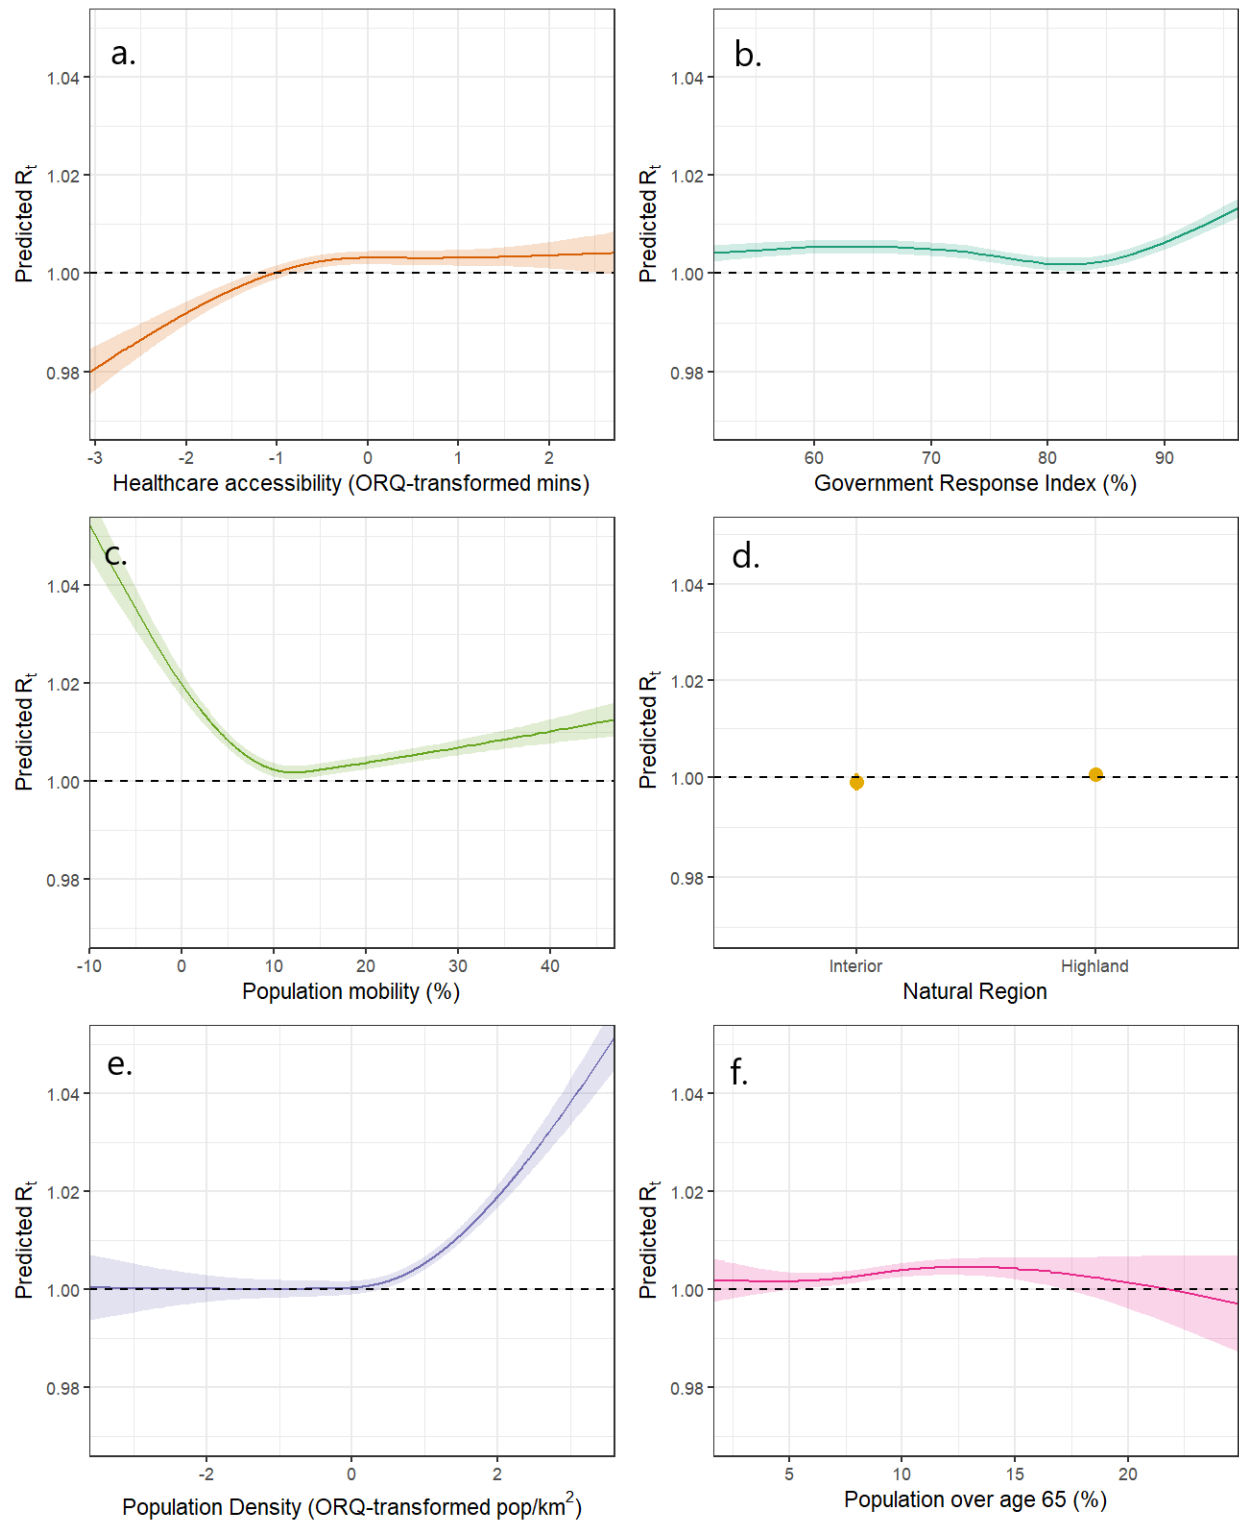

Source: https://medrxiv.org/content/medrxiv/early/2022/06/16/2022.06.13.22276339.full.pdf
